# Supplementary material for: Ancestry diversity in the genetic determinants of the human plasma proteome enhances identification of potential drug targets
Source: bioRxiv or medRxiv preprint supplement (doi:10.1101/2023.11.13.23298365), 2025-03-06
Supplement: Supplementary file [file media-2.pdf]

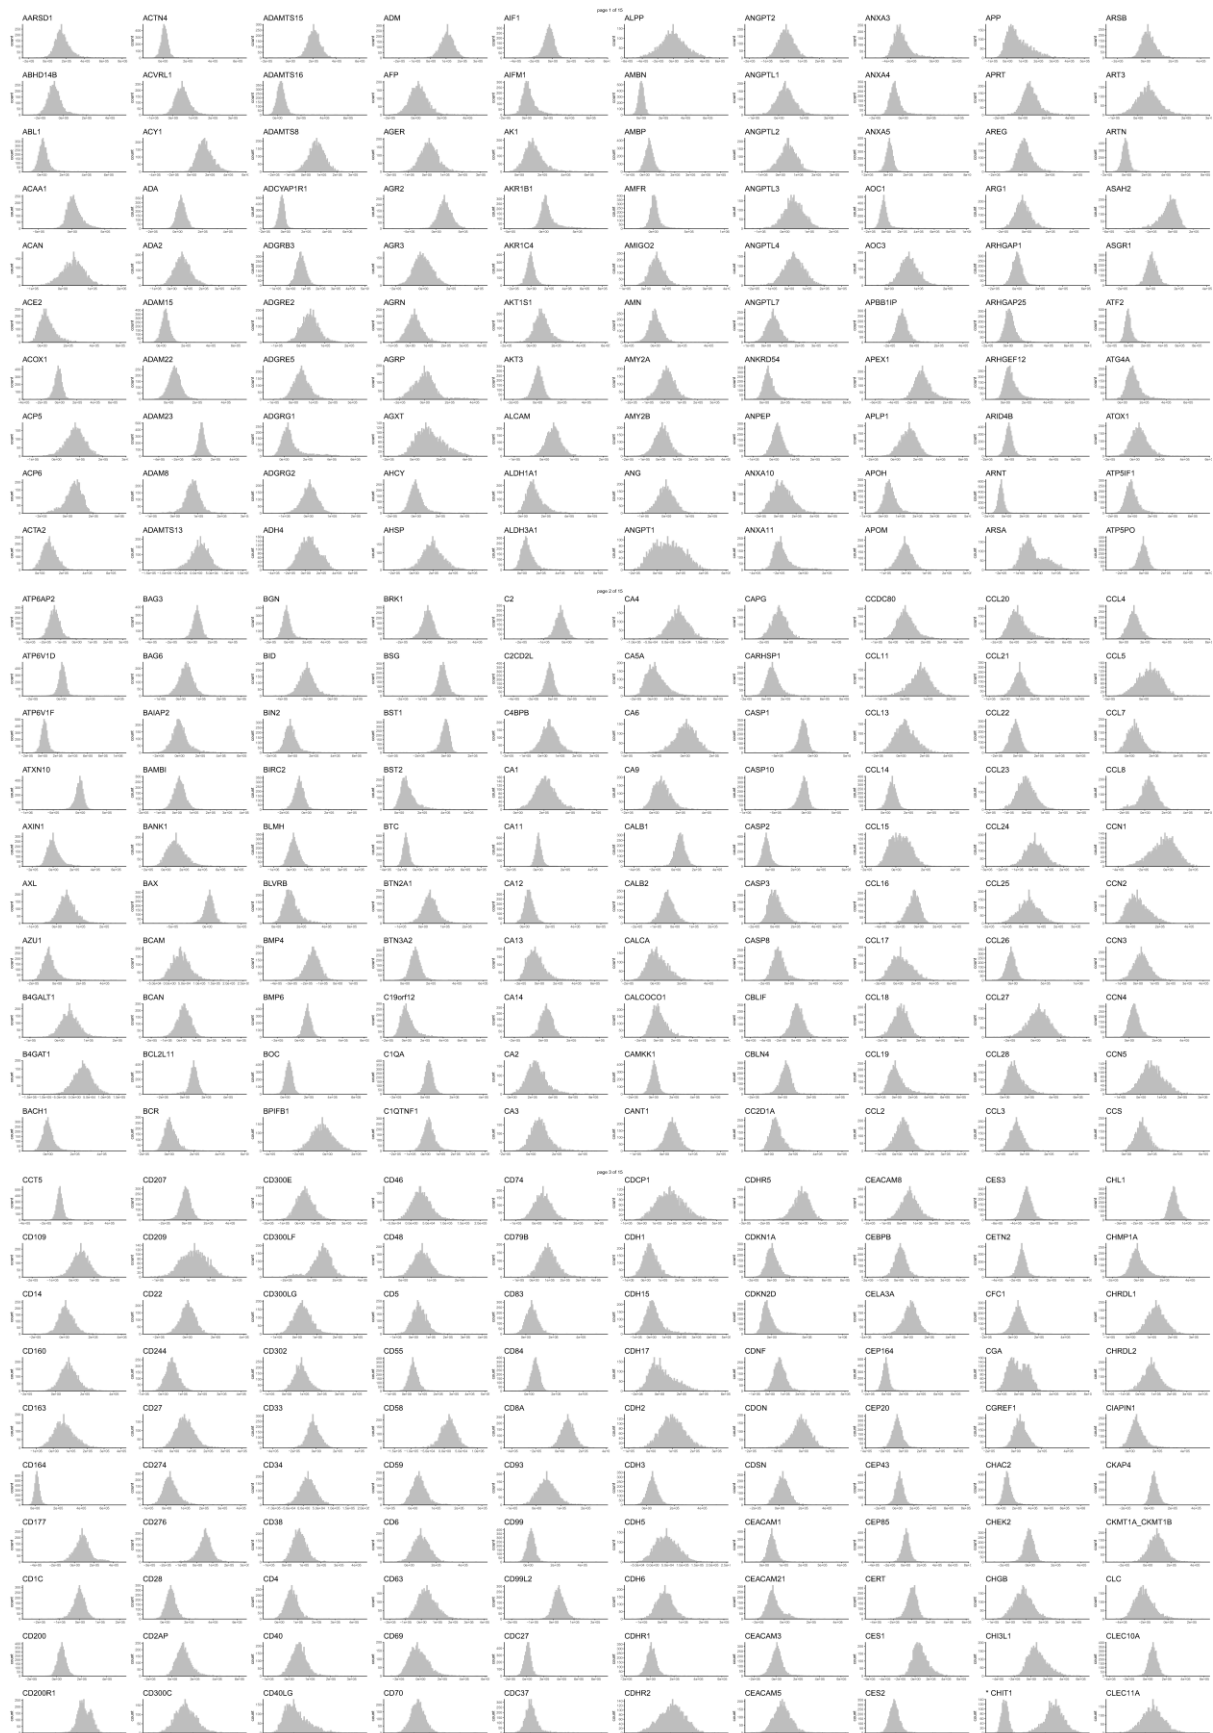

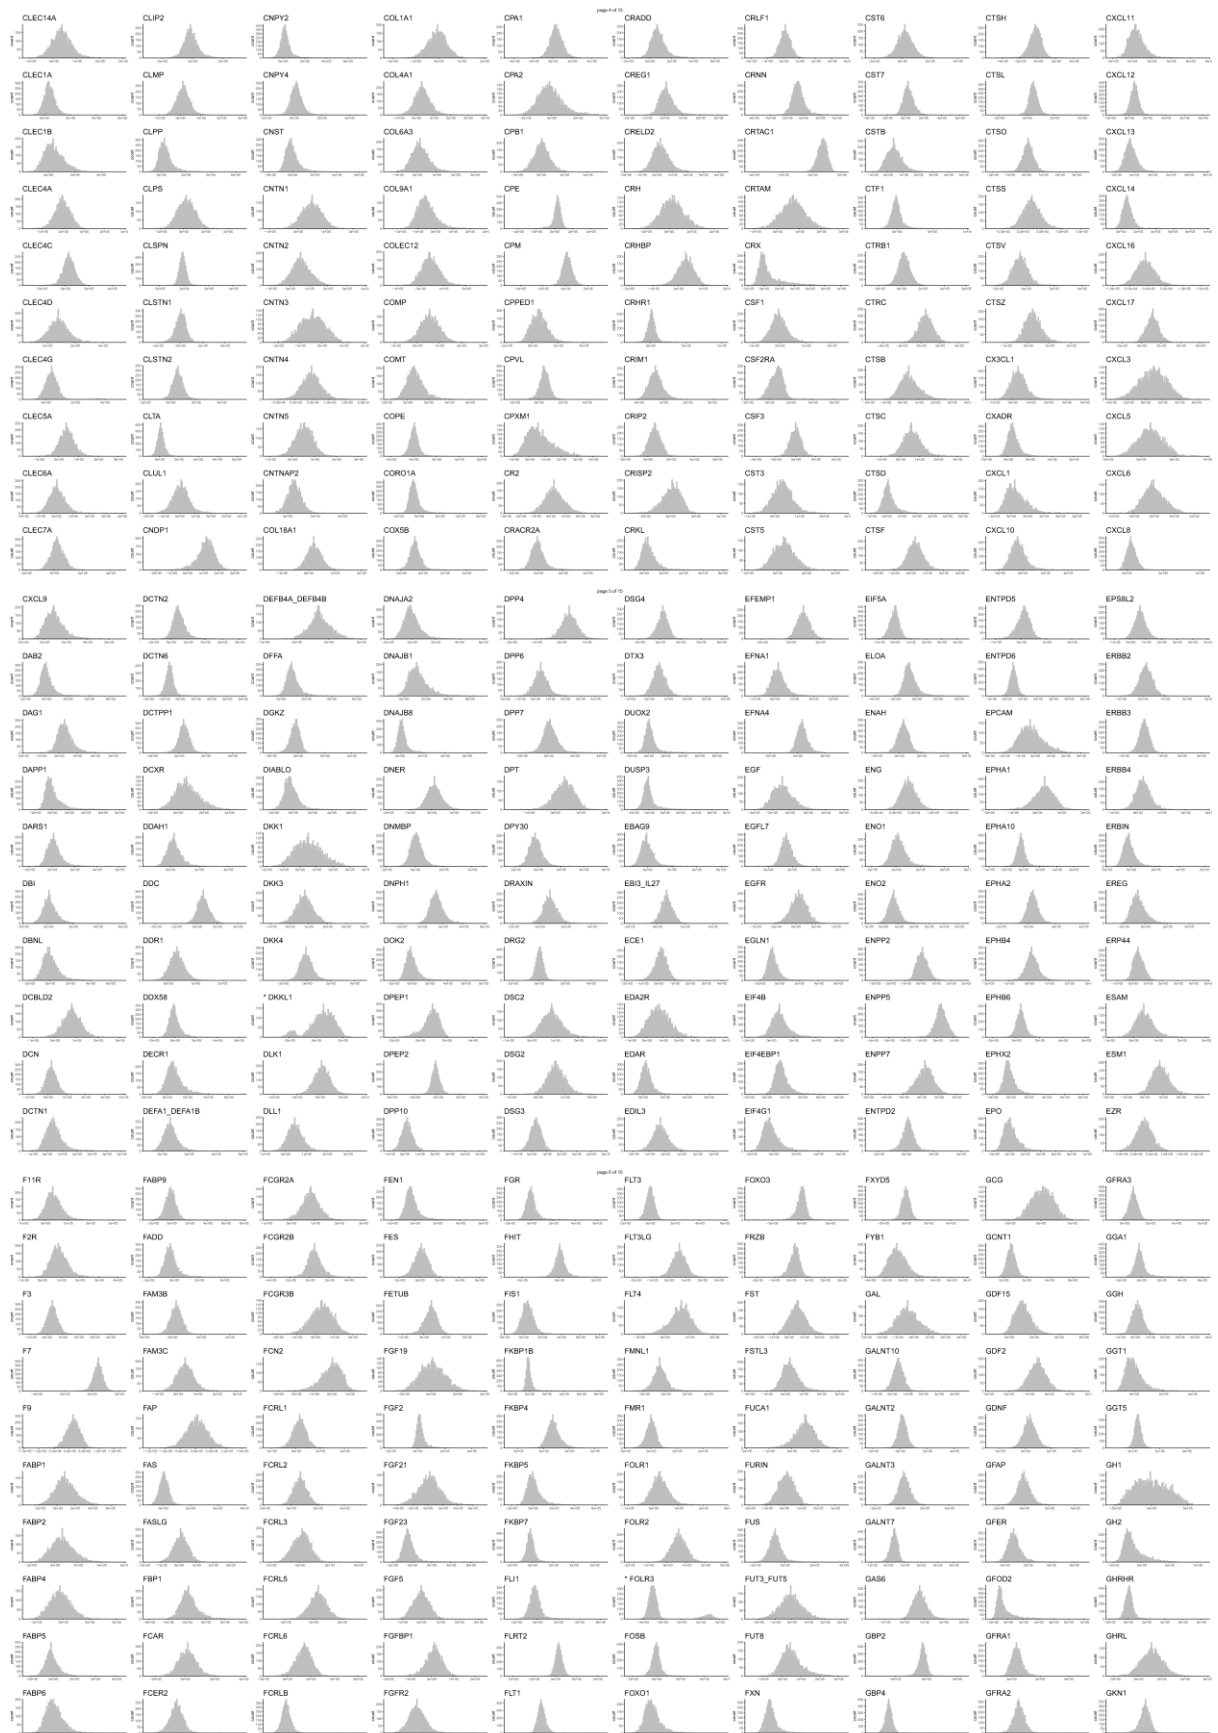

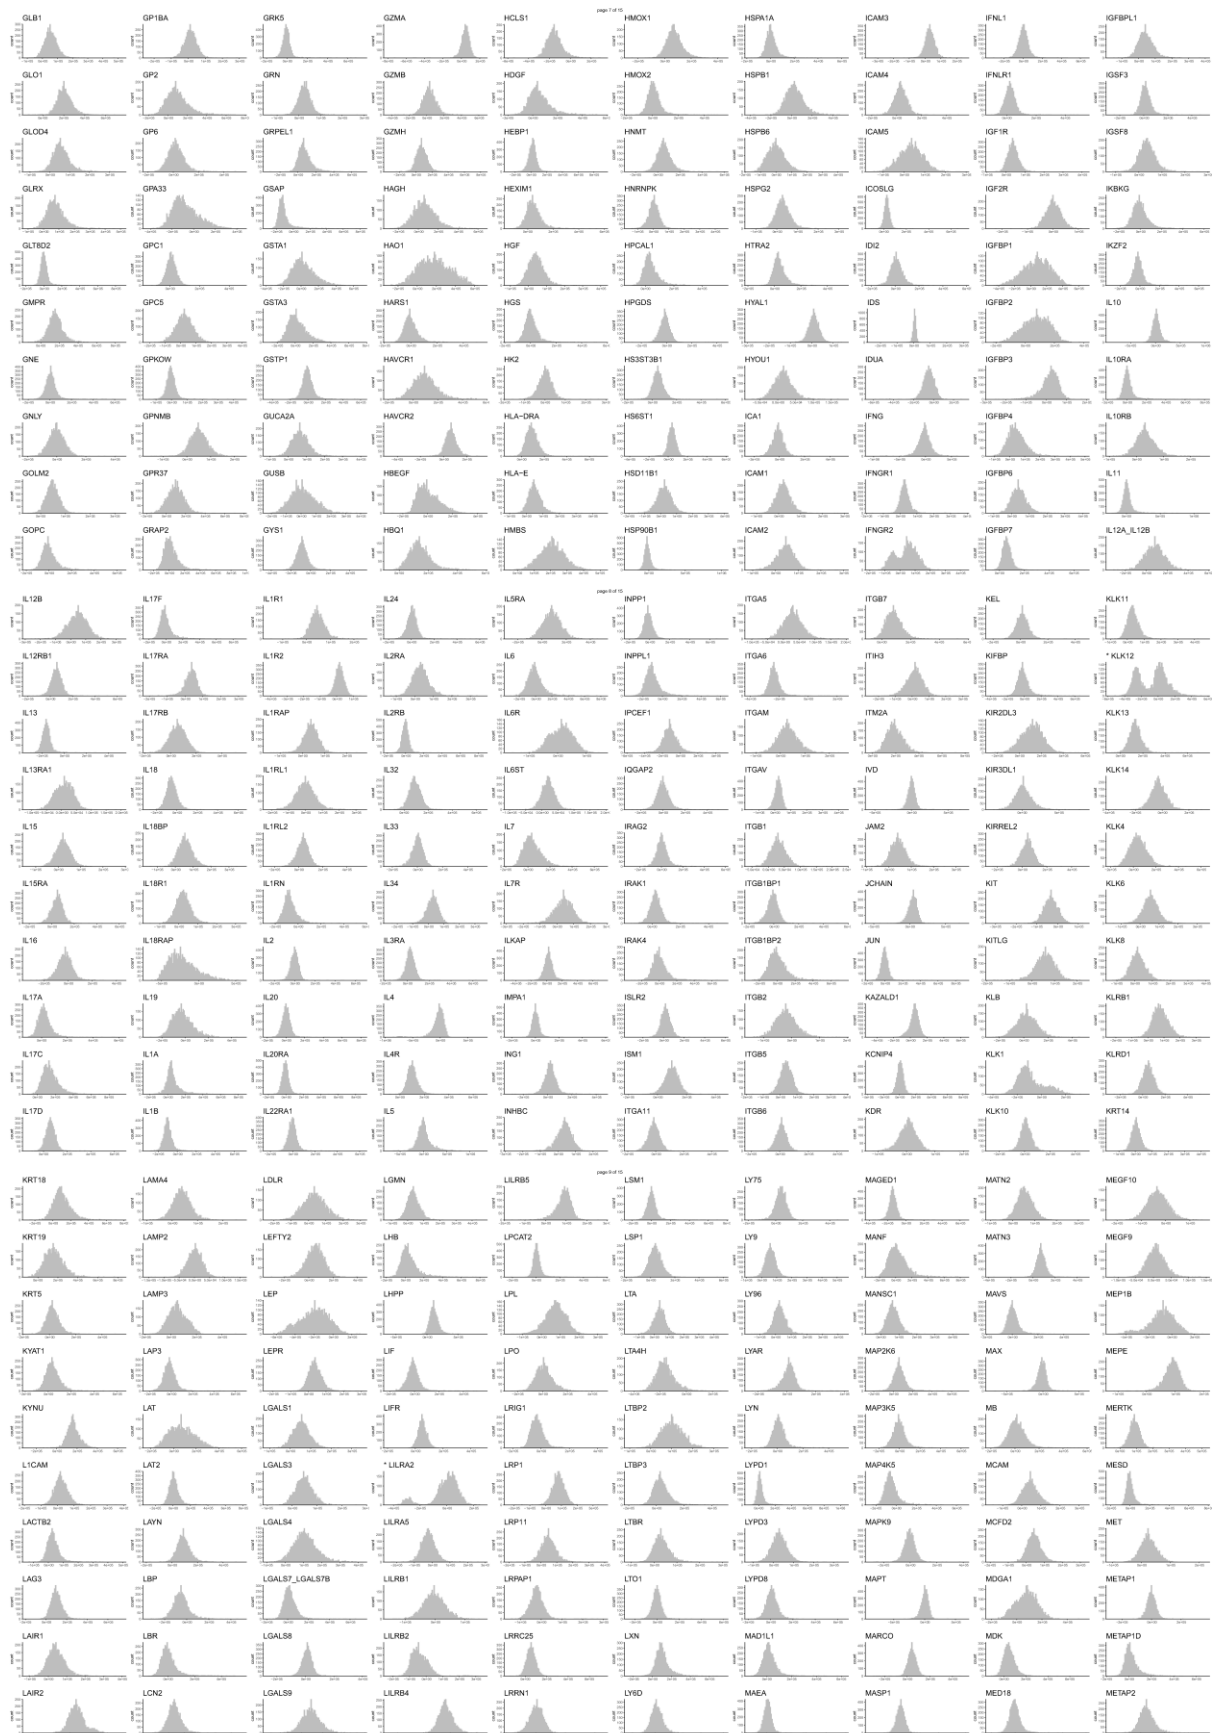

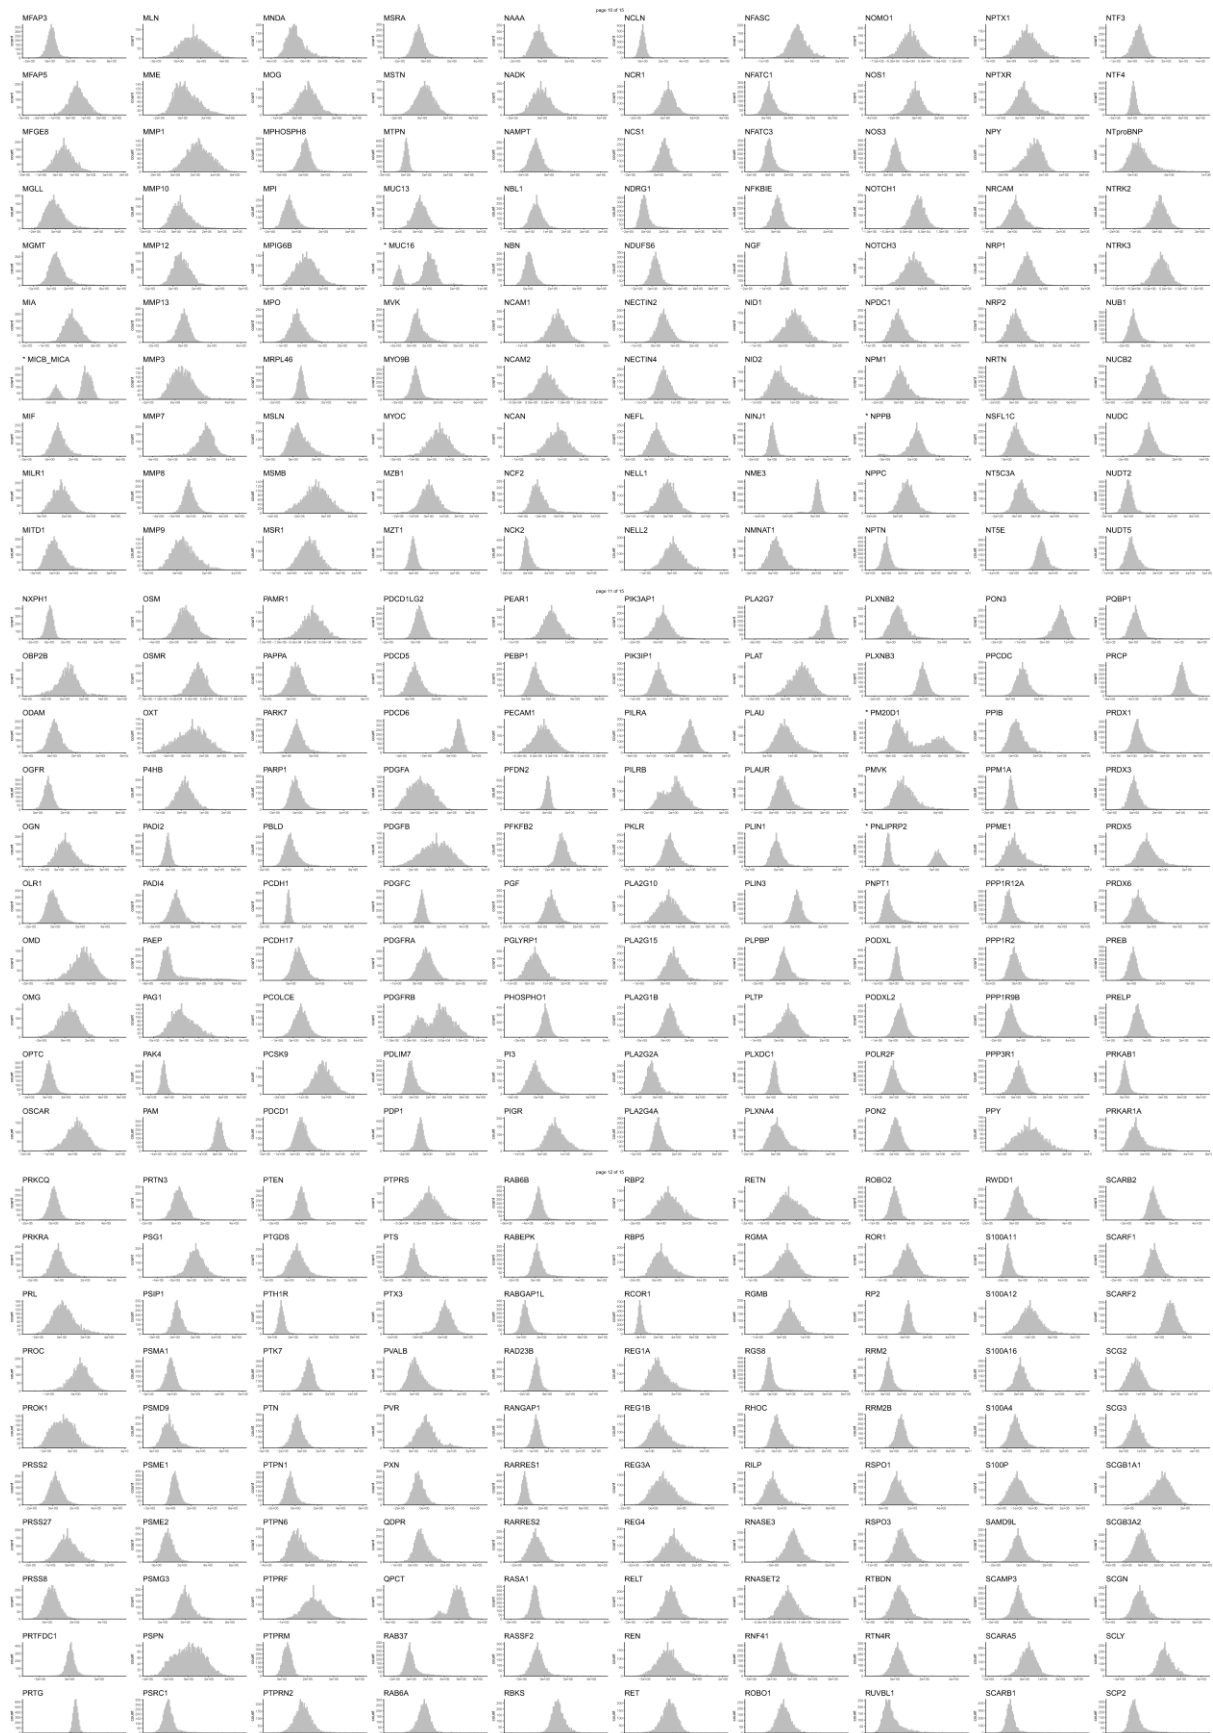

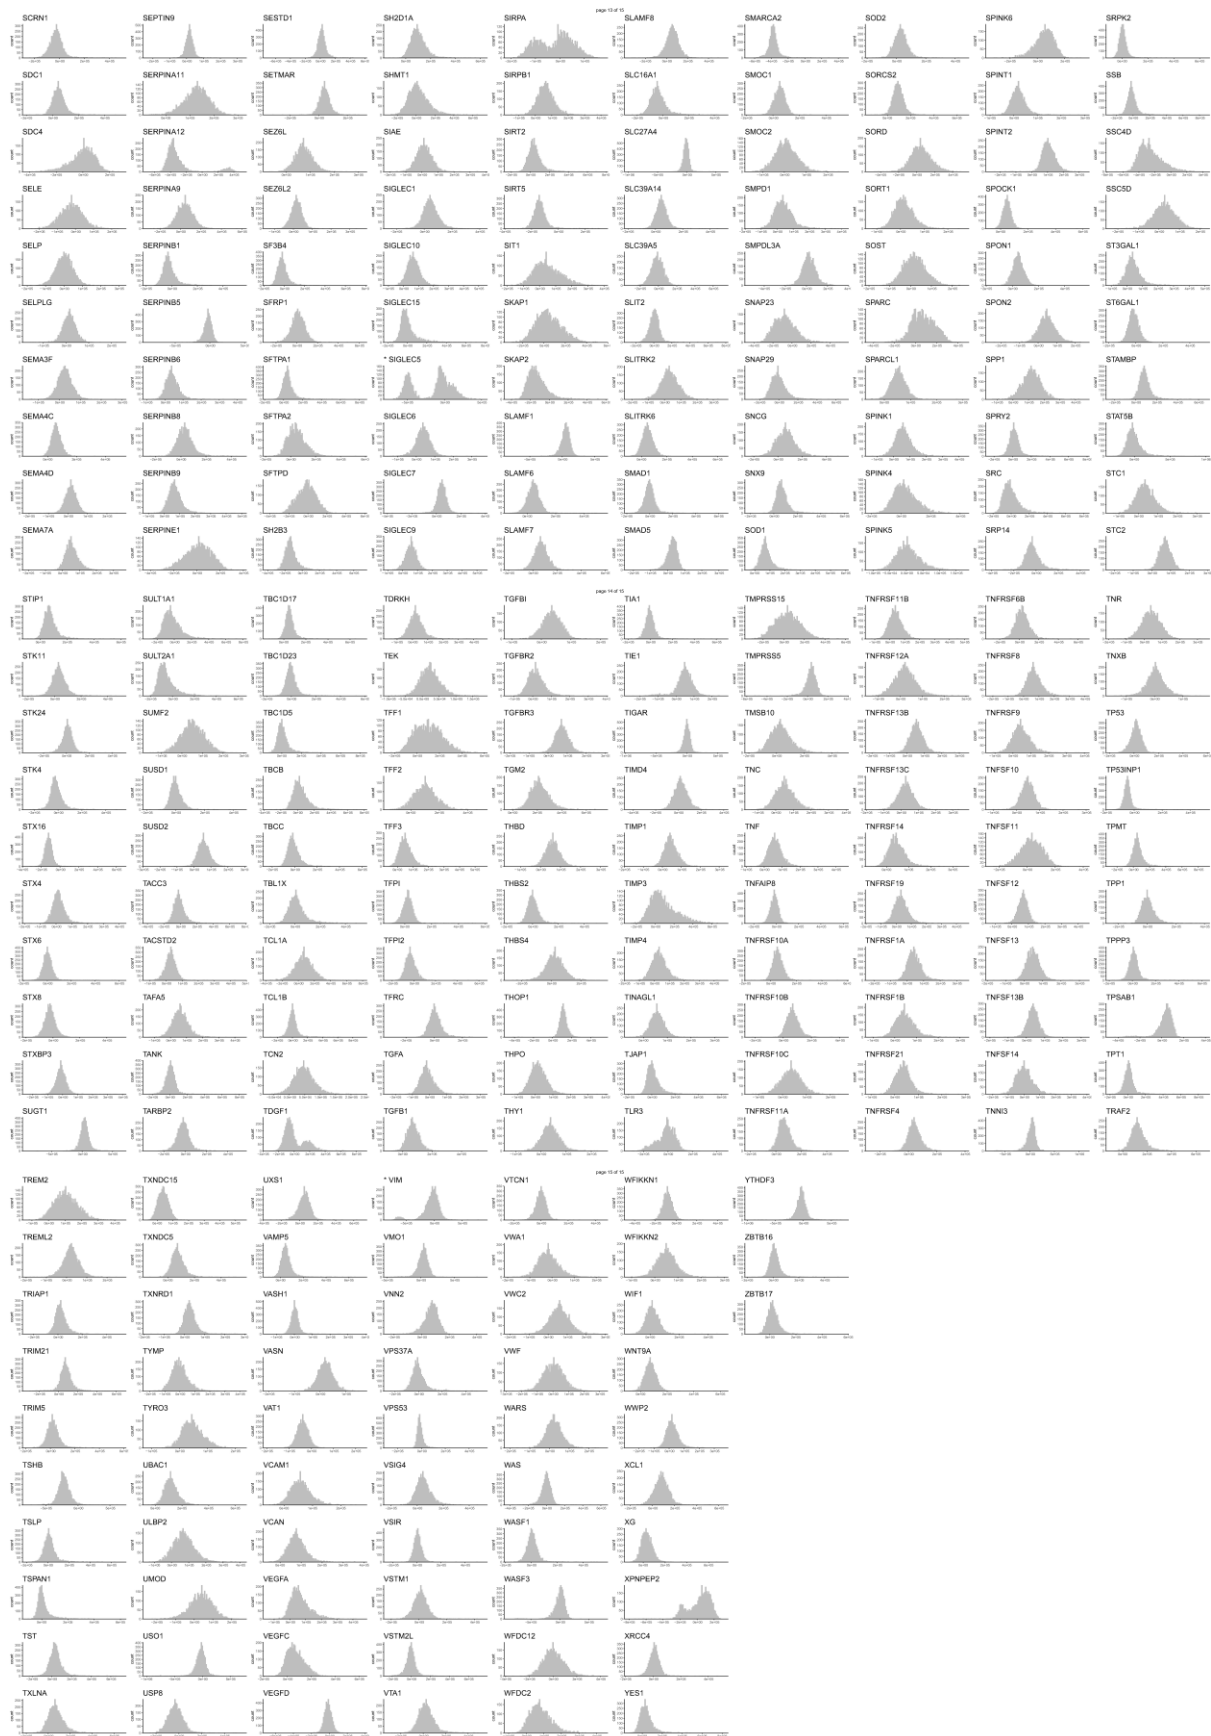

**Figure S1.** Histograms of all measured protein levels ( $\times 10^5$ ). Asterisks denotes bi-modal proteins.

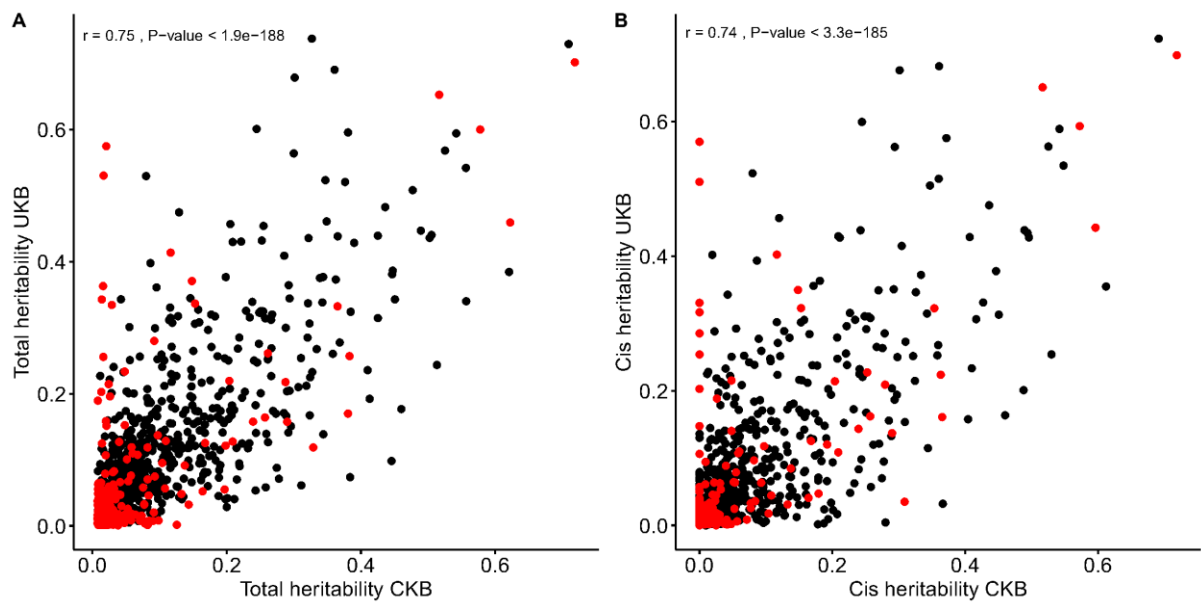

**Figure S2. Pearson's correlation between CKB and UKB proteomic data for (A) total heritability and (B) *cis*-heritability.** Red points are of proteins which have no credible set overlap with UKB.

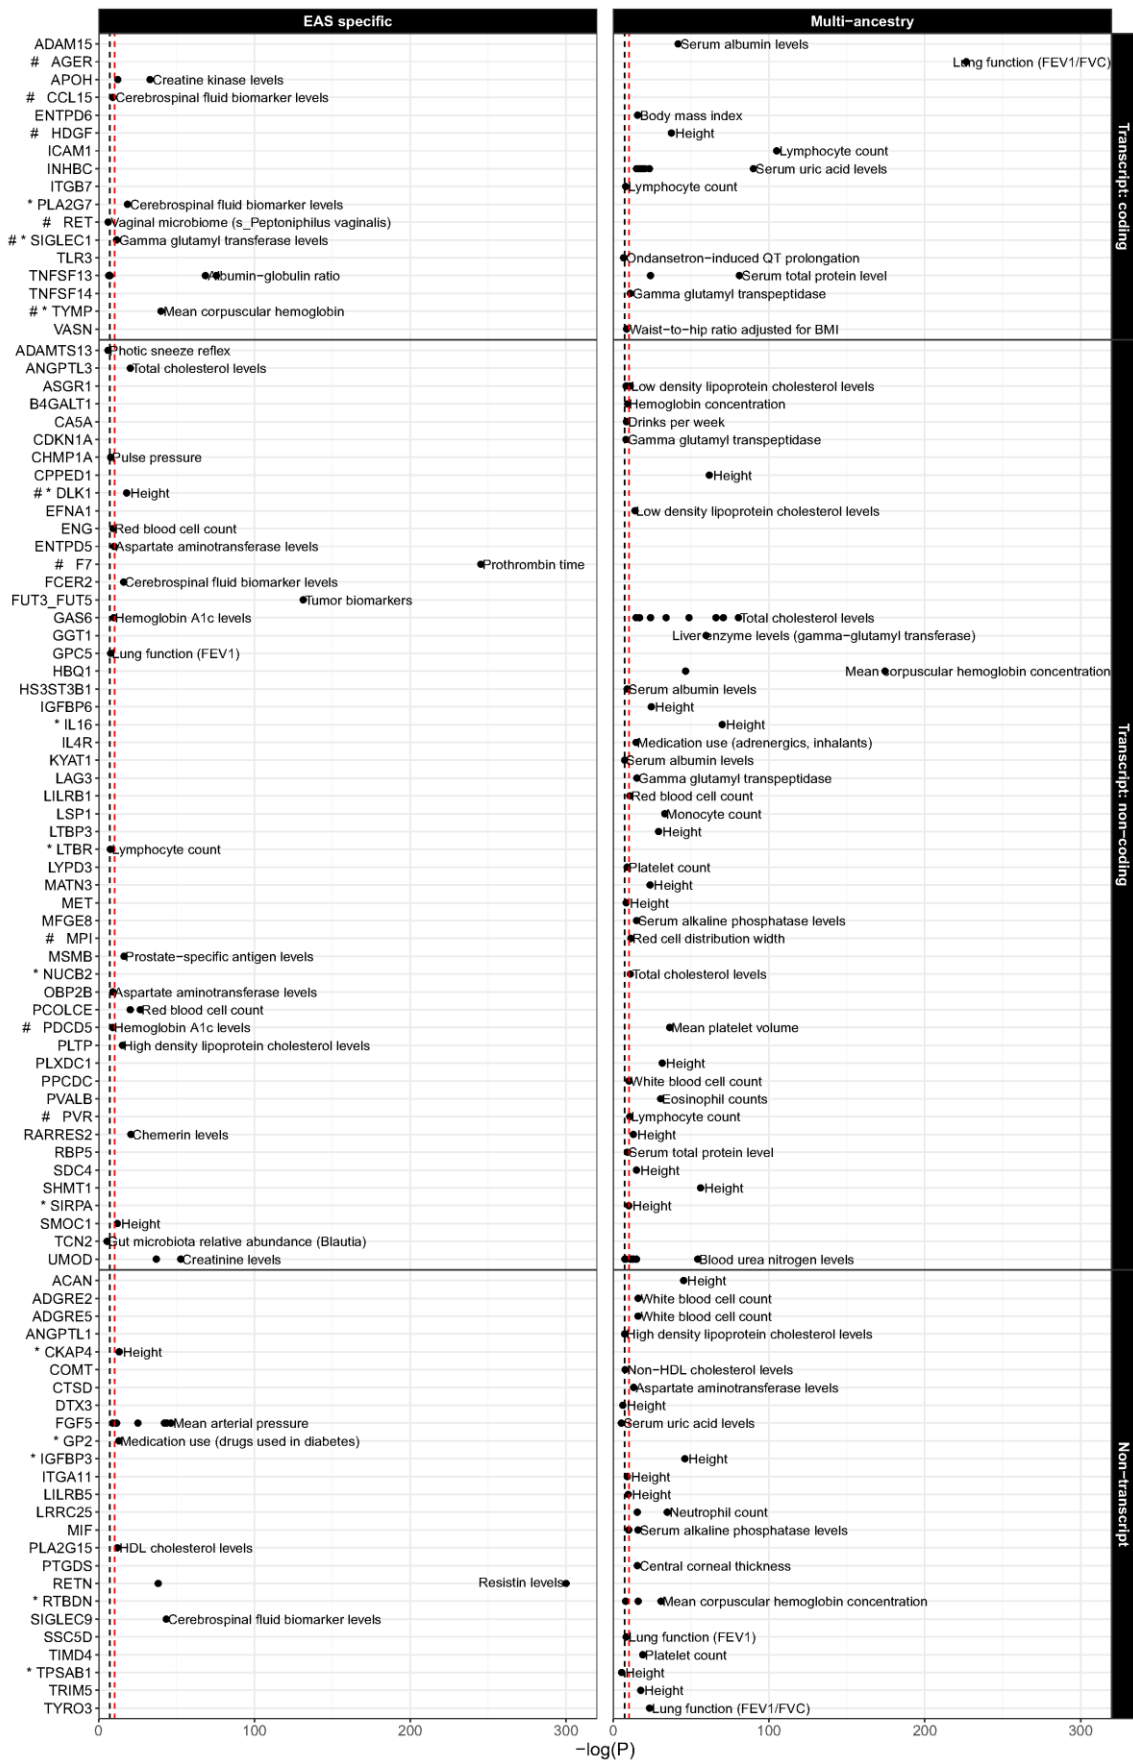

**Figure S3. Clinical measurements associated with proteins in Phenome scan of GWAS catalogue.** The analyses were based on a search of lead protein *cis*-pQTLs or their

proxy with available estimates. Red dotted line is the Bonferroni adjusted threshold, black is genome-wide significant threshold. Proteins with asterisks had no overlapping credible sets in EUR CS. Hashtag denotes where *cis*-pQTL is in protein gene and UKB-PPP lead *cis*-pQTL not in protein gene. The trait with the smallest P-value was labelled in each panel.



CD40 chr20:46119308:T:G P=5.50e-223 MAF=0.403 INFO=0.942

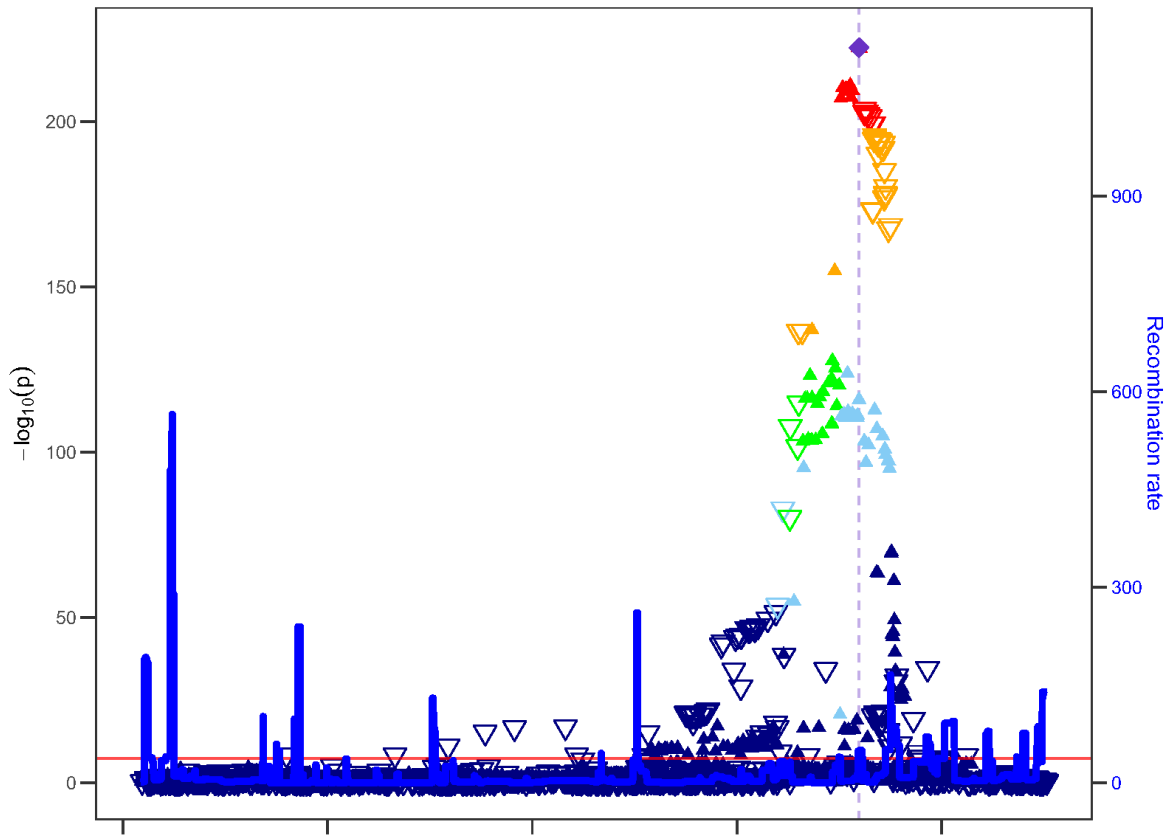

HBV chr20:45958816:T:C P=1.37e-04 MAF=0.205 INFO=0.992

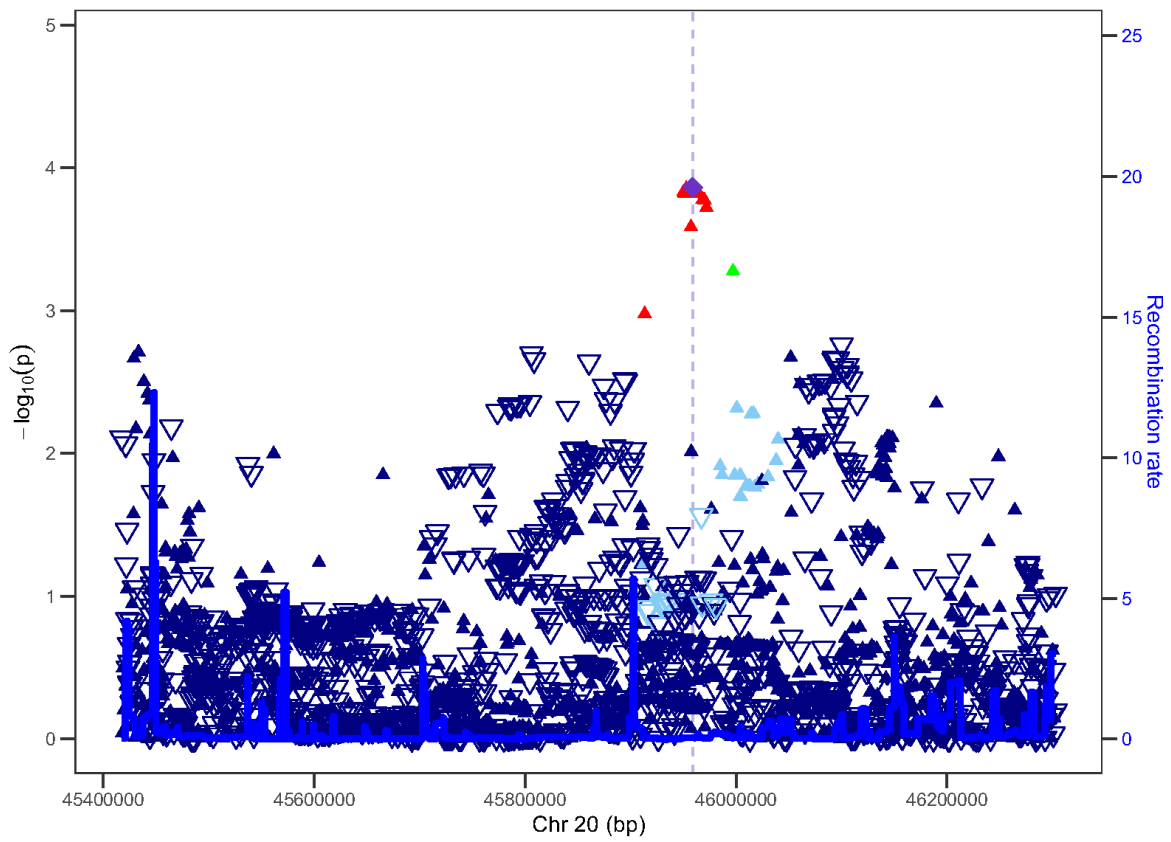

FGF5 chr4:80263187:A:T P=3.00e-172 MAF=0.406 INFO=0.998

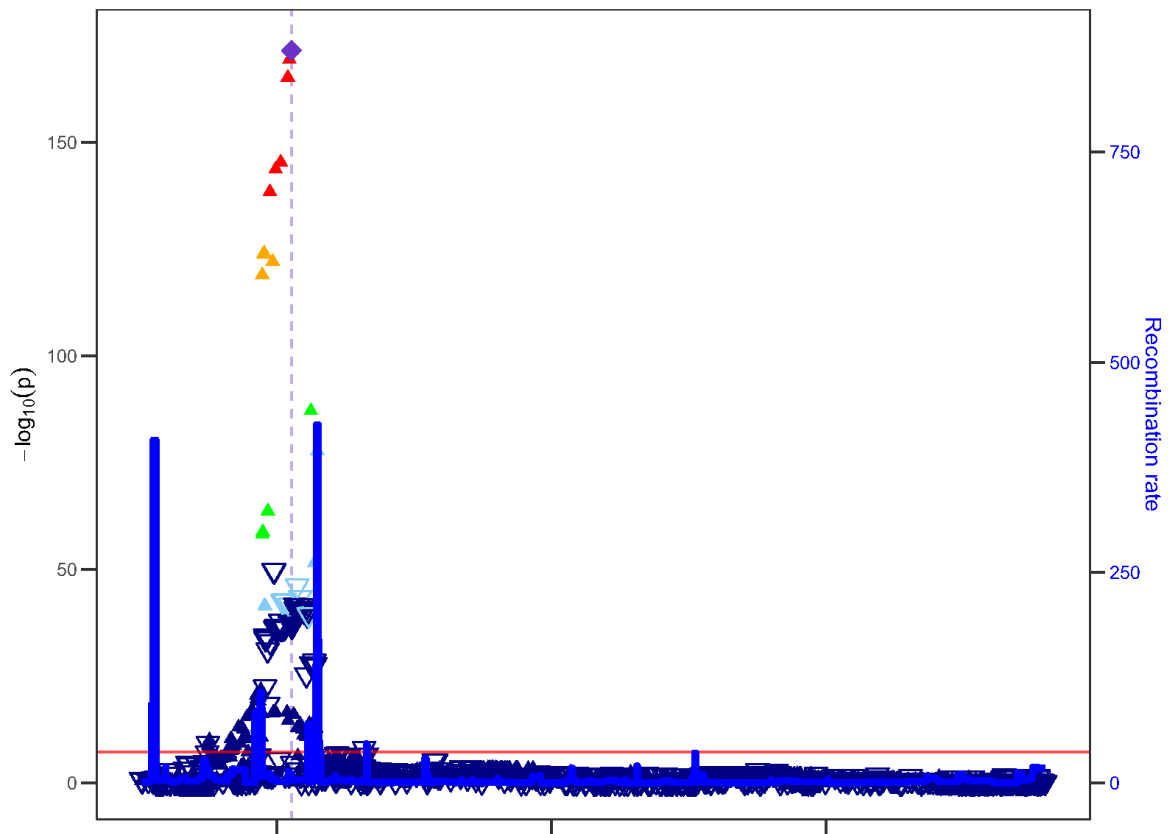

Hypertension chr4:80263187:A:T P=3.55e-37 MAF=0.347 INFO=0.998

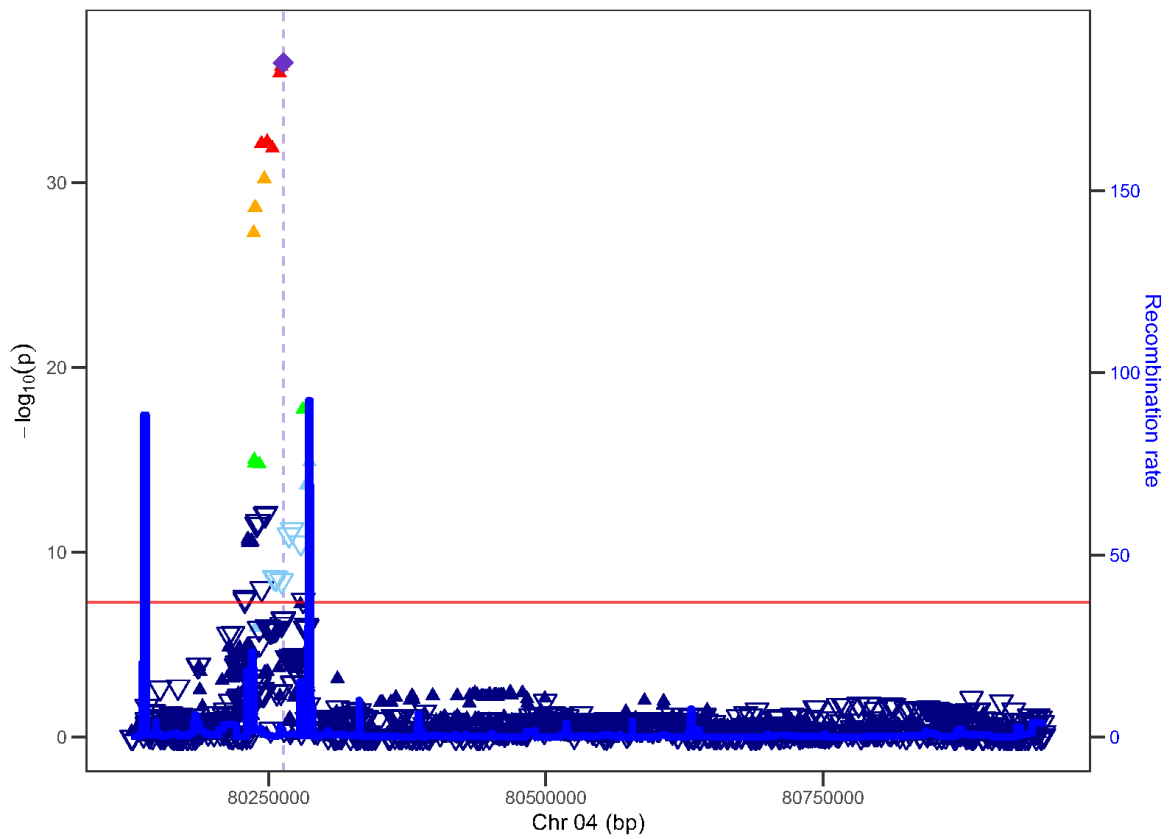

GP2 chr16:20320415:C:G P=2.00e-19 MAF=0.08 INFO=0.988

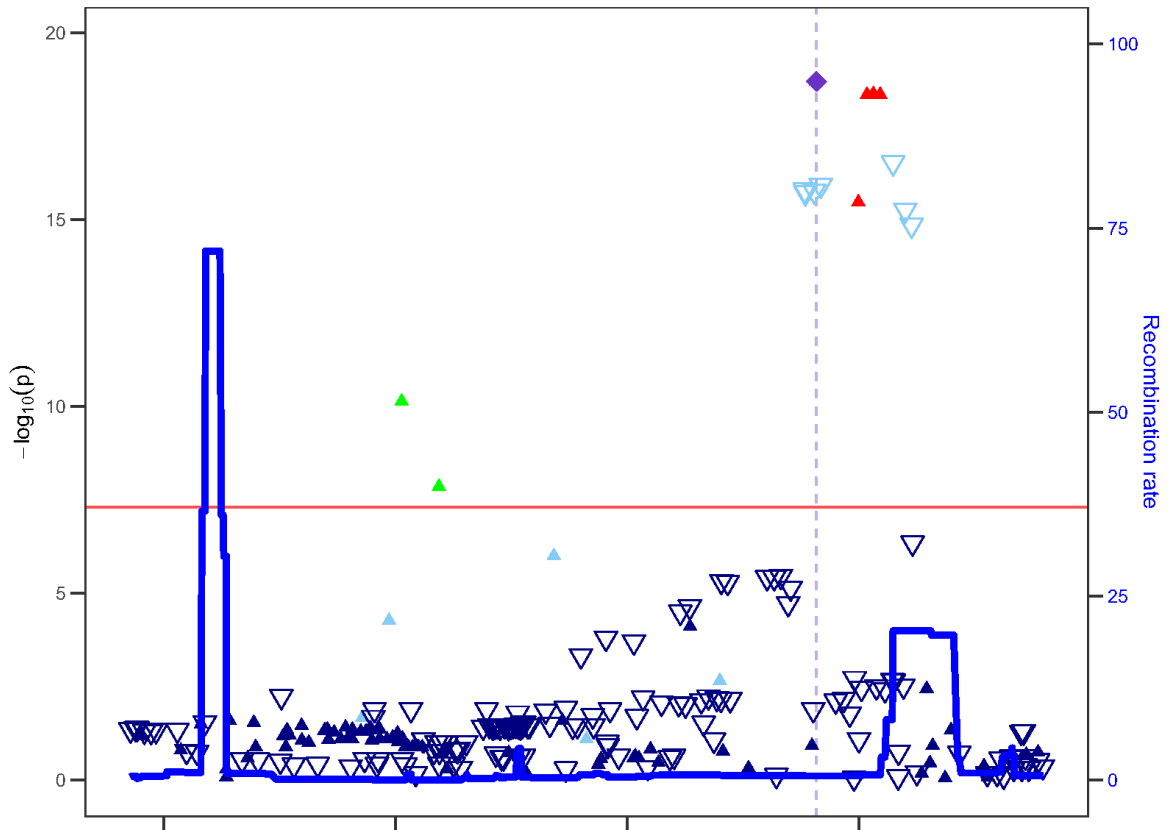

T2D chr16:20320415:C:G P=5.62e-11 MAF=0.076 INFO=0.988

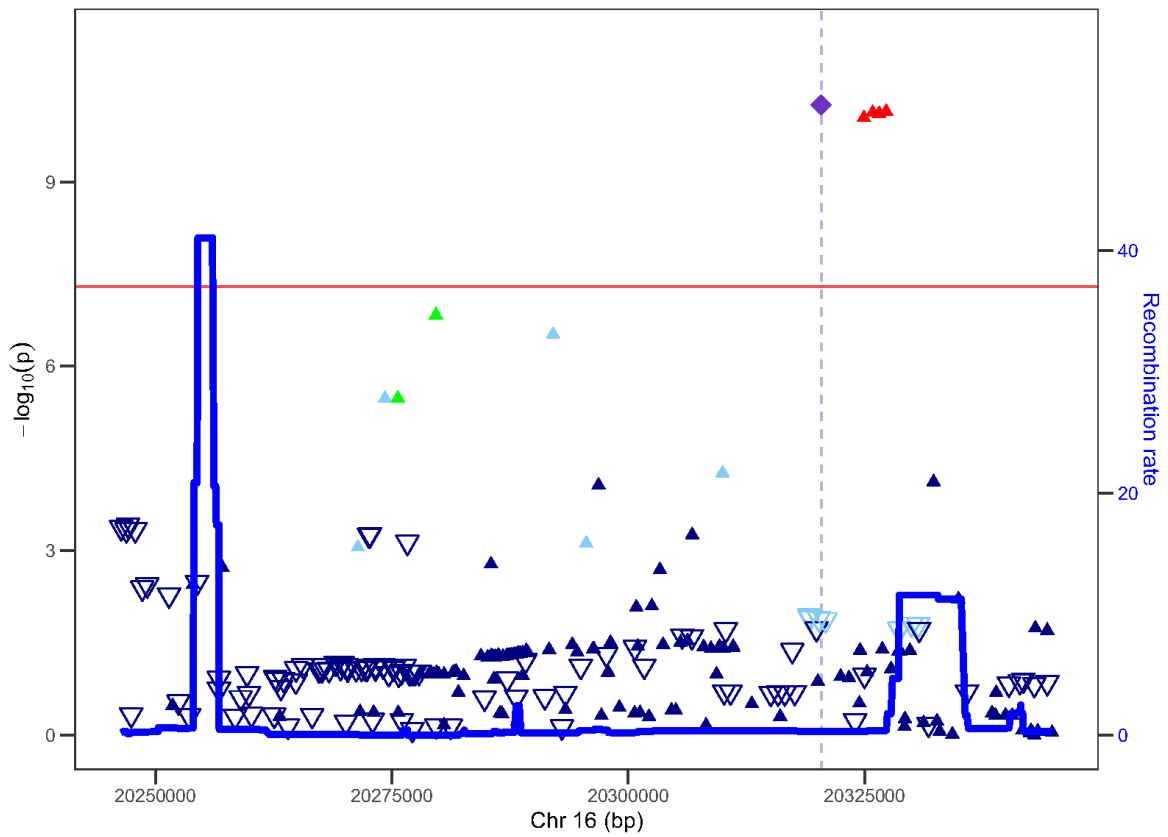

MSMB chr10:46163753:C:T P=1.70e-137 MAF=0.24 INFO=0.972

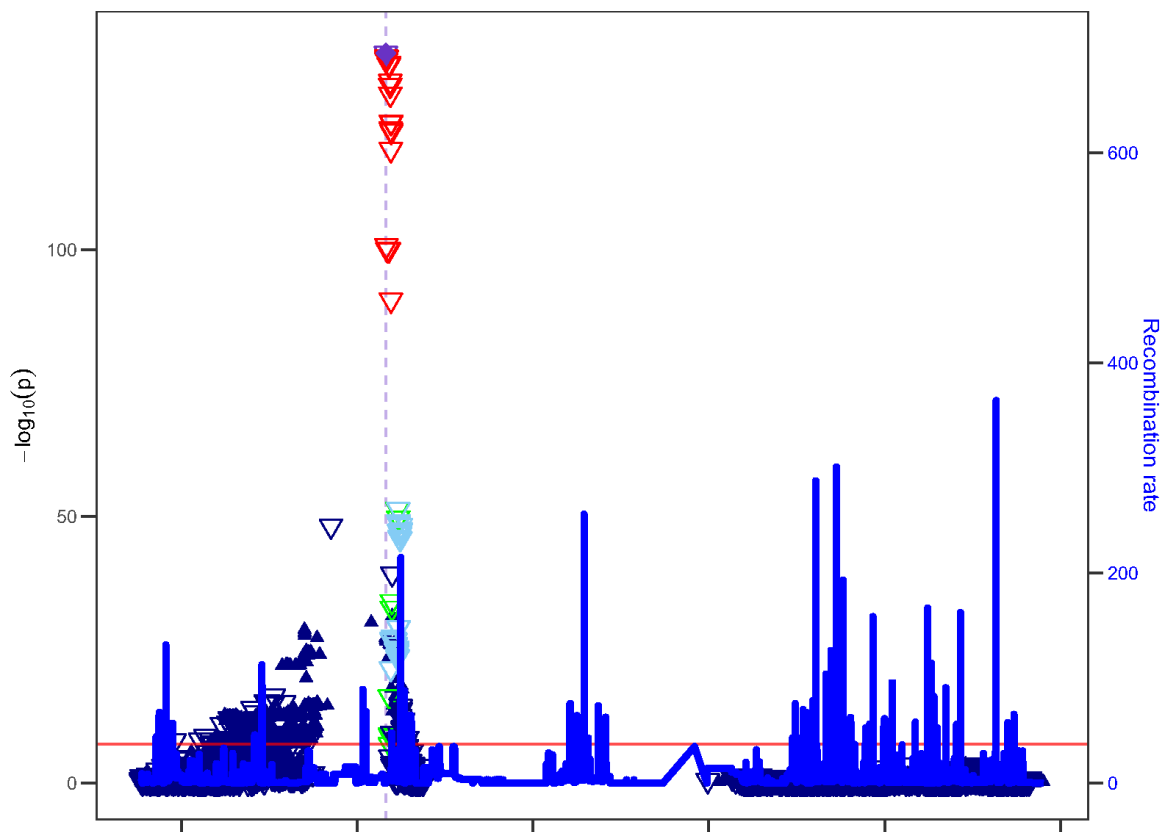

Prostate cancer chr10:46080363:C:T P=7.78e-14 MAF=0.461 INFO=0.992

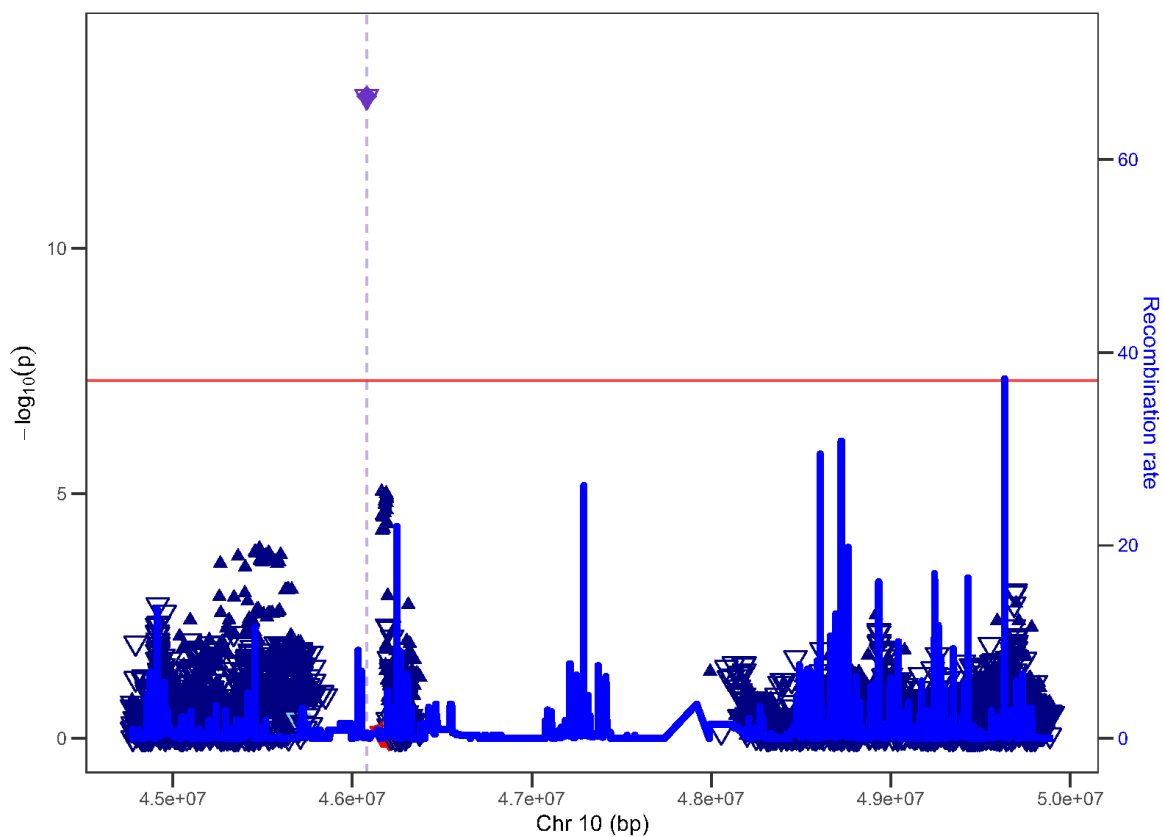

OBP2B chr9:133215442:G:A P=3.50e-320 MAF=0.436 INFO=0.955

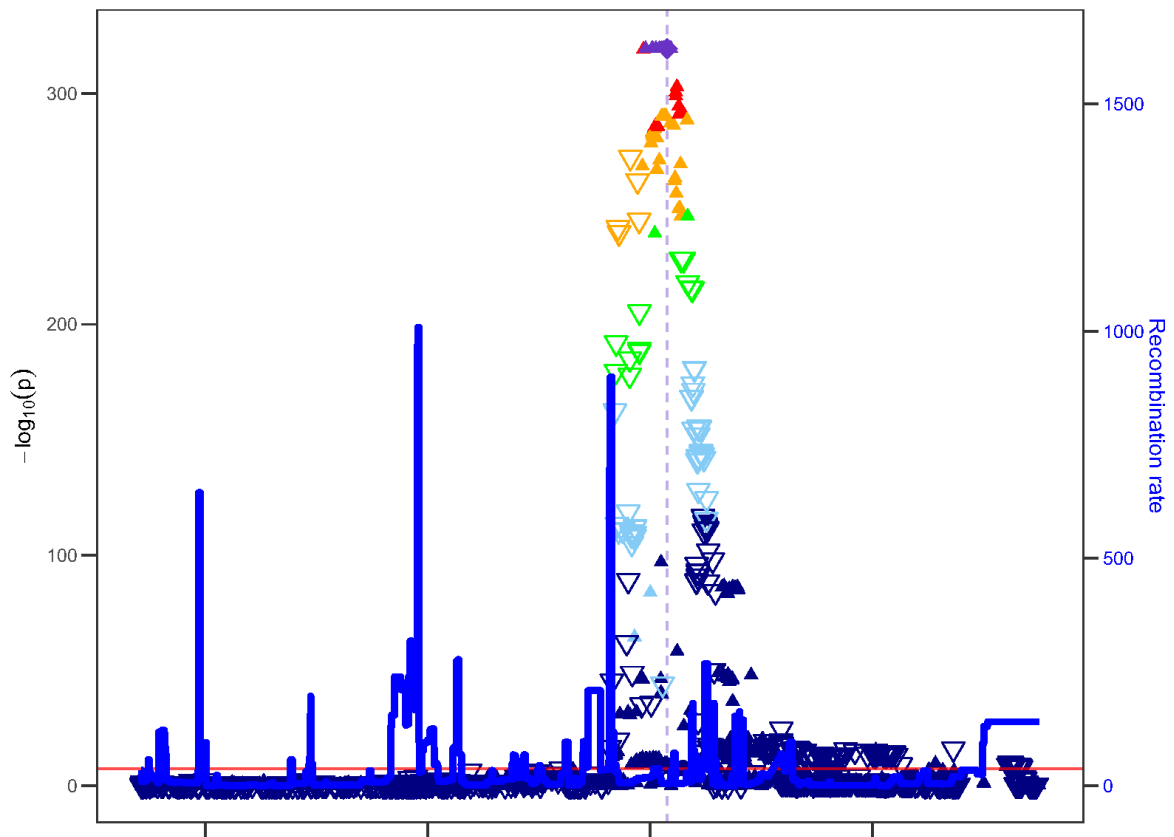

Gastric cancer chr9:133251152:A:ACT P=2.77e-07 MAF=0.251 INFO=0.932

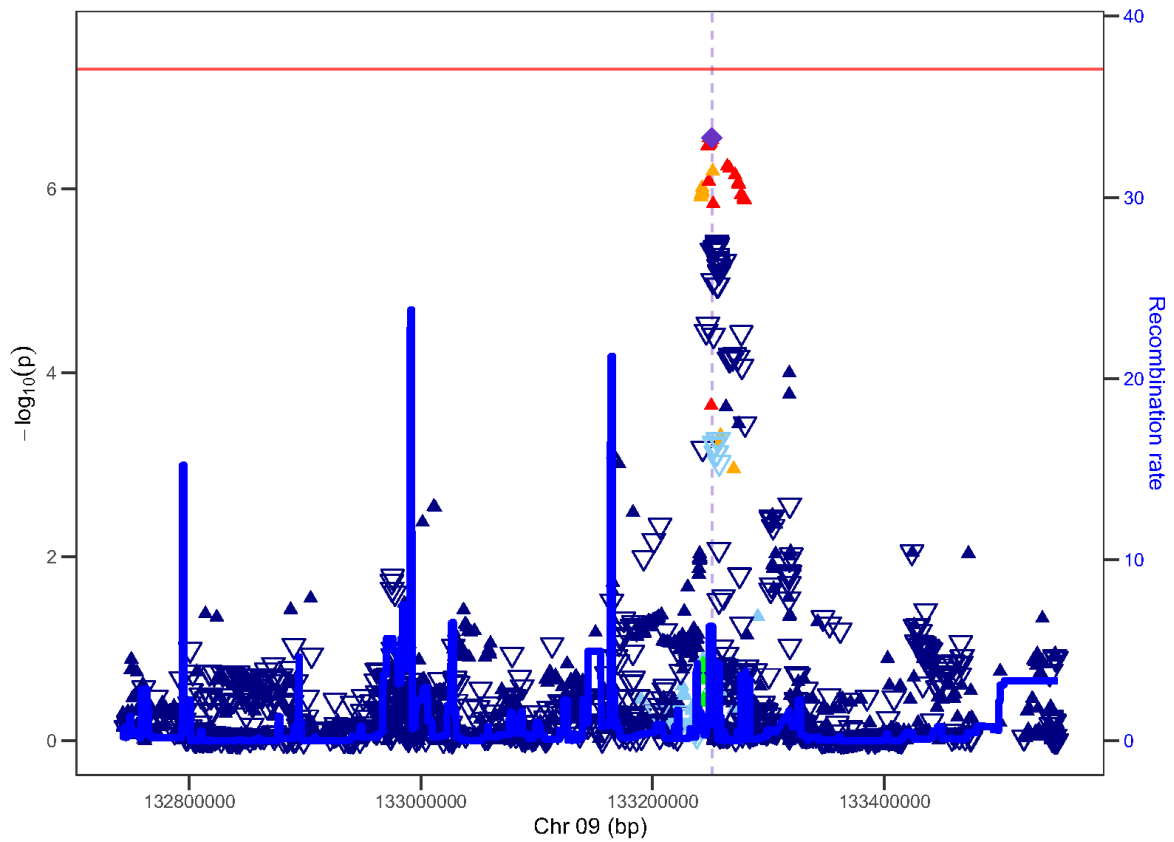

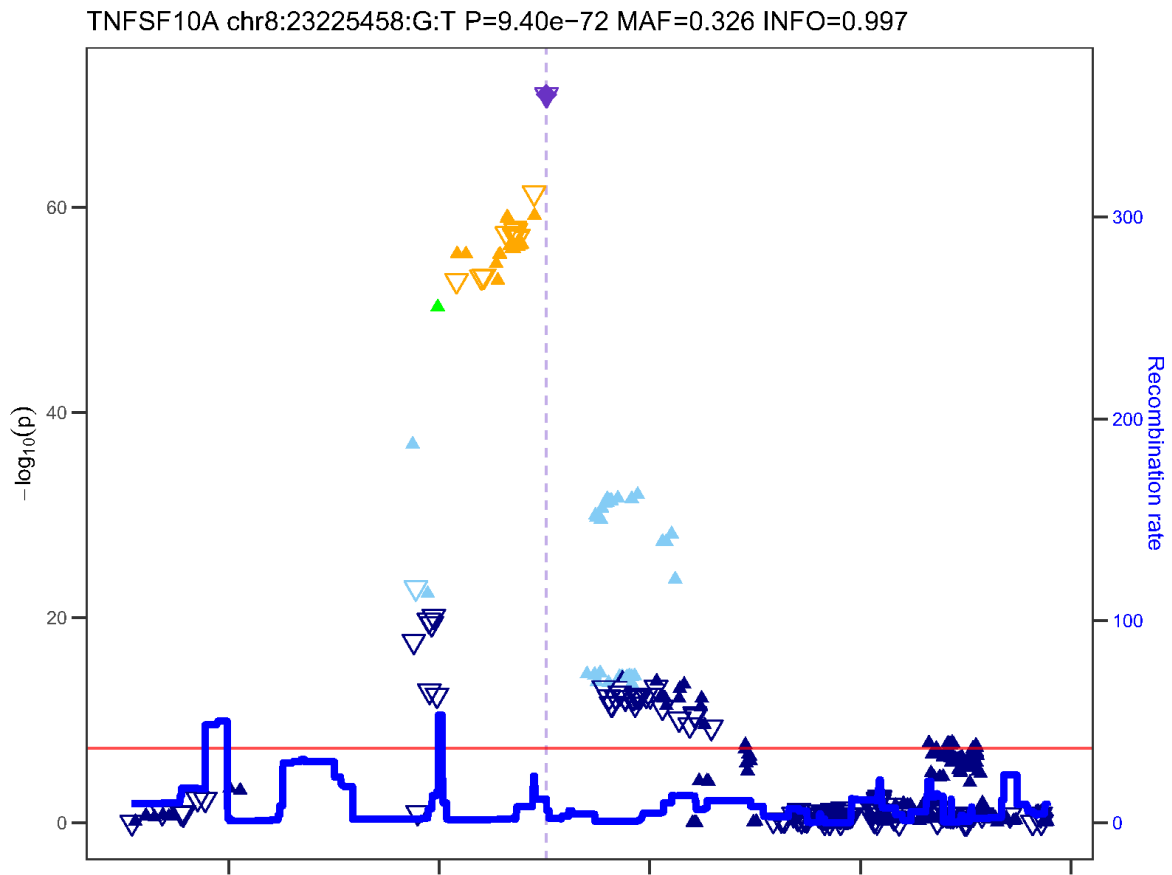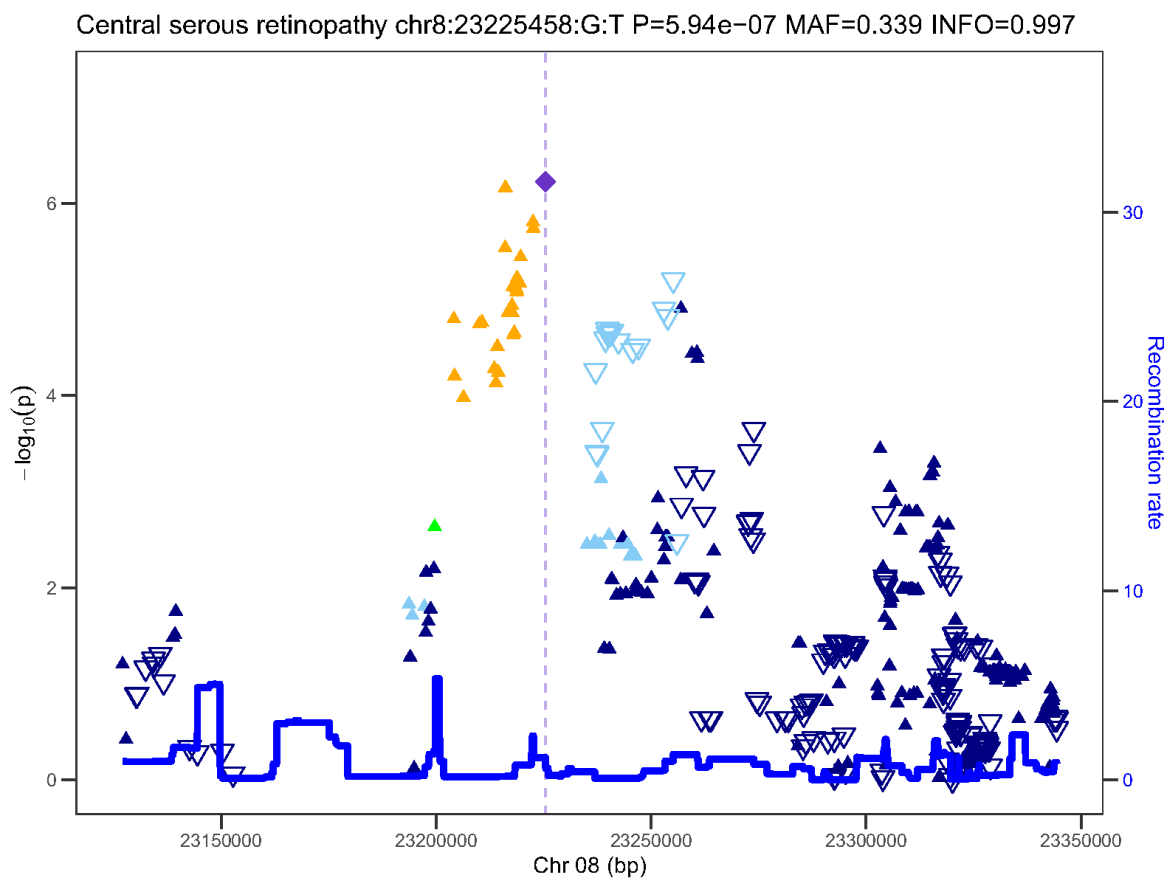

**Figure S4-9. Locus zoom plots for EAS specific protein-disease pairs identified.**

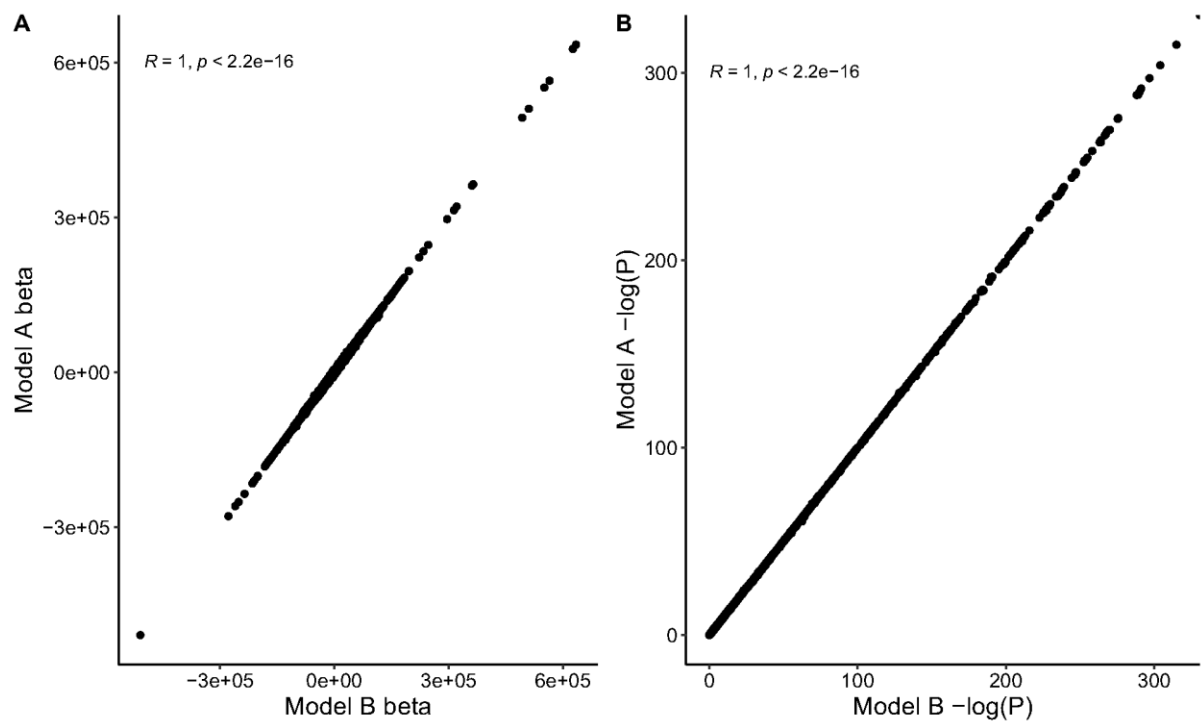

**Figure S10. Sensitivity tests of lead pQTL genotype tested with protein levels using different models in (A) comparison by effect size (beta), and (B) comparison by P-value. Model A: without ascertainment of ischaemic heart disease case status; Model B with ascertainment.**
